# Supplementary material
Source: PubMed Central journal article supplement (PMC5338533)
Supplement: pnas.1615676114.sapp.pdf [file pnas.1615676114.sapp.pdf]

**Supporting Information:**

1. Materials and Methods
2. Supplementary Figures S1-S15
3. Supplementary Tables S1-S4
4. References

## 1. Materials and Method

**Plant materials and growth conditions.** All *Arabidopsis thaliana* plants were of Columbia ecotype. *tcp20* (SALK\_088460C), *nlp6* (SALK\_036557) and *nlp7* mutants (SALK\_26134) were obtained from ABRC. *nlp6tcp20*, *nlp7tcp20* and *nlp6nlp7* double mutants were produced by crossing the two parental lines, selfing the F1 plants, and selecting F2 homozygous progeny homozygous by PCR analysis. Basal medium contained 10 mM KH<sub>2</sub>PO<sub>4</sub>/K<sub>2</sub>HPO<sub>4</sub> (pH 5.8), 2 mM MgSO<sub>4</sub>, 1 mM CaCl<sub>2</sub>, 0.125 mM NaFeEDTA, 0.5% (wt/vol) sucrose, 0.125 mM H<sub>3</sub>BO<sub>3</sub>, 0.03 mM MnSO<sub>4</sub>, 2.5 mM ZnSO<sub>4</sub>, 2.5 mM CuSO<sub>4</sub>, 0.5 mM Na<sub>2</sub>MoO<sub>4</sub>, and 0.5% agarose. This basal medium was complemented with KNO<sub>3</sub>/NH<sub>4</sub>NO<sub>3</sub>/ammonium succinate as the sole nitrogen source at the concentration indicated for each individual experiment. After storing for 2 d at 4 °C in the dark, plates were vertically positioned in a growth chamber at 23 °C for 6-7d with a 24-h light and light intensity of 140 μmol m<sup>-2</sup>s<sup>-1</sup> unless otherwise descriptions. For N starvation treatment, 5 mM KCl was added to N-free medium plates to balance ion strength. *N. benthamiana* seeds were first germinated in soil. The two- to three-leaf stage seedlings were then washed with water to get rid of soil, and transferred to perlite. Hydroponic solution used for *N. benthamiana* growth contains the same components as the basal medium except for the addition of sucrose and agarose.

**Plasmid constructions.** Gibson DNA assembly method was employed to all cloning steps (46) unless otherwise descriptions. The DNA binding regions of TCP20 (TCP20-DB), NLP6 (NLP6-DB) and NLP7 (NLP7-DB) were amplified with the primers listed in Table S2 and then cloned to pGEX-2TK. For yeast-two-hybrid, the full length of *TCP20* was cloned into the sites EcoR I and Xho I of pB42AD vector. The EcoR I end was filled with dNTP and became blunt end. The PCR products of full length TCP20 were digested by Xho I and then treated with T4

polynucleotide kinase for 5' end phosphorylation before ligation. The full length of NLP6/7 was cloned into pGilda vectors. For TCP20-YFP, NLP6-YFP and NLP7-YFP constructs, the full length of TCP20, NLP6 and NLP7 were cloned into the NcoI site between 35S promoter and YFP in a pGREEN II0229 vector.

**Protein expression and purification.** The growth conditions of Escherichia coli cells (strain BL21, Biopioneer) harboring GST expression constructs (pGEX-2T) were described (16, see main text reference). The detailed purification steps were as described (47).

**Electrophoretic mobility shift assay (EMSA).** Briefly, Each oligonucleotide pair was annealed in buffer containing 10mM Tris, 1 mM EDTA and 50 mM NaCl, pH 8.0 by using 95°C, 5min; 70 cycles 95°C (-1C/cycle), 1 min; 4°C hold in a thermocycler. Then double-stranded small DNAs were purified by 12% non-denature acrylamide gel. The right size bands were cut and crashed in TE (pH8.0) buffer. Gel slurry was pressed through a 0.45µm sterile cellulose acetate filter to remove gel particles. Amicon Ultra-0.5 centrifugal filter devices were used to concentrate DNAs and remove salt. All DNA probes contain four-nucleotide-overhang at 3' end. DNA probes were then labelled by using Biotin 3' end DNA labeling kit (Thermo).

**Yeast two-hybrids (Y2H).** The LexA inducible system was applied for Y2H. pGilda and pB42AD constructs were cotransformed into EGY48 yeast strain (-Ura). The corresponding empty vector was used as negative controls. Positive colonies were selected on plates (-Ura, -His, -Trp + glucose) and then verified by PCR. Induction of protein-protein interaction was tested by growing the resulting yeast strains on plates in the presence of galactose and raffinose (DB Falcon). X-gal was used for blue and white colorimetric assays on plates.

**Bimolecular fluorescence complementation and transient expression.** Briefly, full-length or all of deletion derivatives *TCP20*, *NLP6*, *NLP7* cDNA were directly cloned into pBJ36-SPYNE (YFP N-terminal portion) and pBJ36-SPYCE (YFP C-terminal portion) vector by Gibson DNA assembling. Each cassette was then cut and cloned into the Not I site of pGreenII0179 (SPYCE cassettes) or pGreenII0229 (SPYNE cassettes) (48). All the constructs were transformed into the *Agrobacterium tumefaciens* AGL-0 strain in BiFC experiment. *Agrobacterium* solution was adjusted to OD<sub>600 nm</sub> = 0.5 and then equally mixed before Agroinfiltration. An *Agrobacterium* strain carrying the viral suppressor p19 (49) and an *Agrobacterium* strain containing mCherry-NLS (50) were always used for in this experiment. Middle leaves of juvenile *N. bethamiana* plants at eight-leaf-stage were used for Agroinfiltration. The detailed procedures were described in (33, see main text reference).

**Transgenic lines.** Transgenic *Arabidopsis* plants were produced by the floral-dip procedure using 4-week-old plants and *Agrobacterium tumefaciens* cultures containing the appropriate constructs(51). Seeds from treated plants were collected and screened. Transgenic plants carrying both 35S::TCP20-cYFP and 35S::NLP6/7-nYFP were produced by crossing the two T1 parental lines (each contains one BiFC construct). The seedlings that grow on the selective media containing hygromycin and Basta have been used for experiments.

**Confocal microscopy.** The infiltrated *N. bethamiana* leaves were imaged using a Zeiss MLS 710 confocal microscope after 3 days Agroinfiltration. YFP signals (Green) and mCherry (Red) signals were captured at the same time from different detection channels. A 514 nm laser line was used to stimulate YFP and mCherry. A 514-546 nm bandpass filter was used to collect YFP signal and a 610-644 nm bandpass filter was used to collect mCherry signal. To visualize root anatomy, primary roots were stained in 10 mg/L propidium iodide (PI) for 4–6 min, rinsed and

mounted in water. A 584-744 nm bandpass filter was used to collect PI signals. Image J was used to process all the images.

**Real-time quantitative polymerase chain reaction (qPCR).** Total RNA was prepared from total roots using an RNeasy Plant Mini kit (Qiagen) and quantified with a Genesis 6 spectrophotometer (ThermoSpectronic). Template cDNA samples were prepared using the SuperScript First-Strand Synthesis System kit (Invitrogen) for reverse transcription with 0.5 µg of total RNA in a reaction volume of 15 µL. The cDNA synthesis reaction mixture was diluted 10 times before being used for qPCR. Real-time quantitative PCR was performed using a LightCycler system from Roche Diagnostics. Primers for the PCR reactions were designed to have a melting temperature of about 60–65 °C and to give a PCR product between 175 and 250 bp. The primers are listed in Table S3. The gene expression level was normalized by Ubiquitin 5.

## 2. Supplementary Figures

**Fig. S1.** Identifications of TCP20 and NLP6&7 binding elements in the 109-bp *NIA1* enhancer fragment.

**Fig. S2.** TCP20 -NLP6&7 interactions in transgenic *Arabidopsis* roots.

**Fig. S3.** BiFC analysis of TCP20-TCP20 interactions and empty vectors.

**Fig. S4.** Protein-protein interaction in NLPs under nitrate-grown condition.

**Fig. S5.** The subcellular localization of TCP20-YFP, NLP6-YFP and NLP7-YFP chimeric protein fusions in *N. benthamiana* transient expression system (**A-F**) and transgenic *Arabidopsis* (**G-L**).

**Fig. S6.** The subcellular locations of TCP20 -NLP6&7 interactions under nitrate-grown condition.

**Fig. S7.** The subcellular locations of TCP20 -NLP6&7 interactions in transgenic *Arabidopsis* roots.

**Fig. S8.** Protein-protein interaction in NLPs under N starvation.

**Fig. S9.** Amino acid sequence alignment of NLP6&7 PB1 domains and the C-terminal domains of TCP20 from different species by using Clustal Omega.

**Fig. S10.** A PB1 domain of NLPs is important for their protein-protein interaction.

**Fig. S11.** BiFC assay of interactions between NLP6&7 and deleted derivatives of TCP20.

**Fig. S12.** NLP6 and NLP7 are partially redundant activators of nitrate transport, assimilation and signaling genes under nitrate growth condition (5 mM KNO<sub>3</sub>).

**Fig. S13.** Phenotype of *nlp6nlp7* double mutants under different nitrogen growth conditions.

**Fig. S14.** Proximal *CYCBI;1* promoter region.

**Fig. S15.** Root phenotype under 5 mM nitrate (A) or N starvation (B), primary root length (C) and root meristem length (C) of WT, single mutants and double mutants under N starvation treatment.

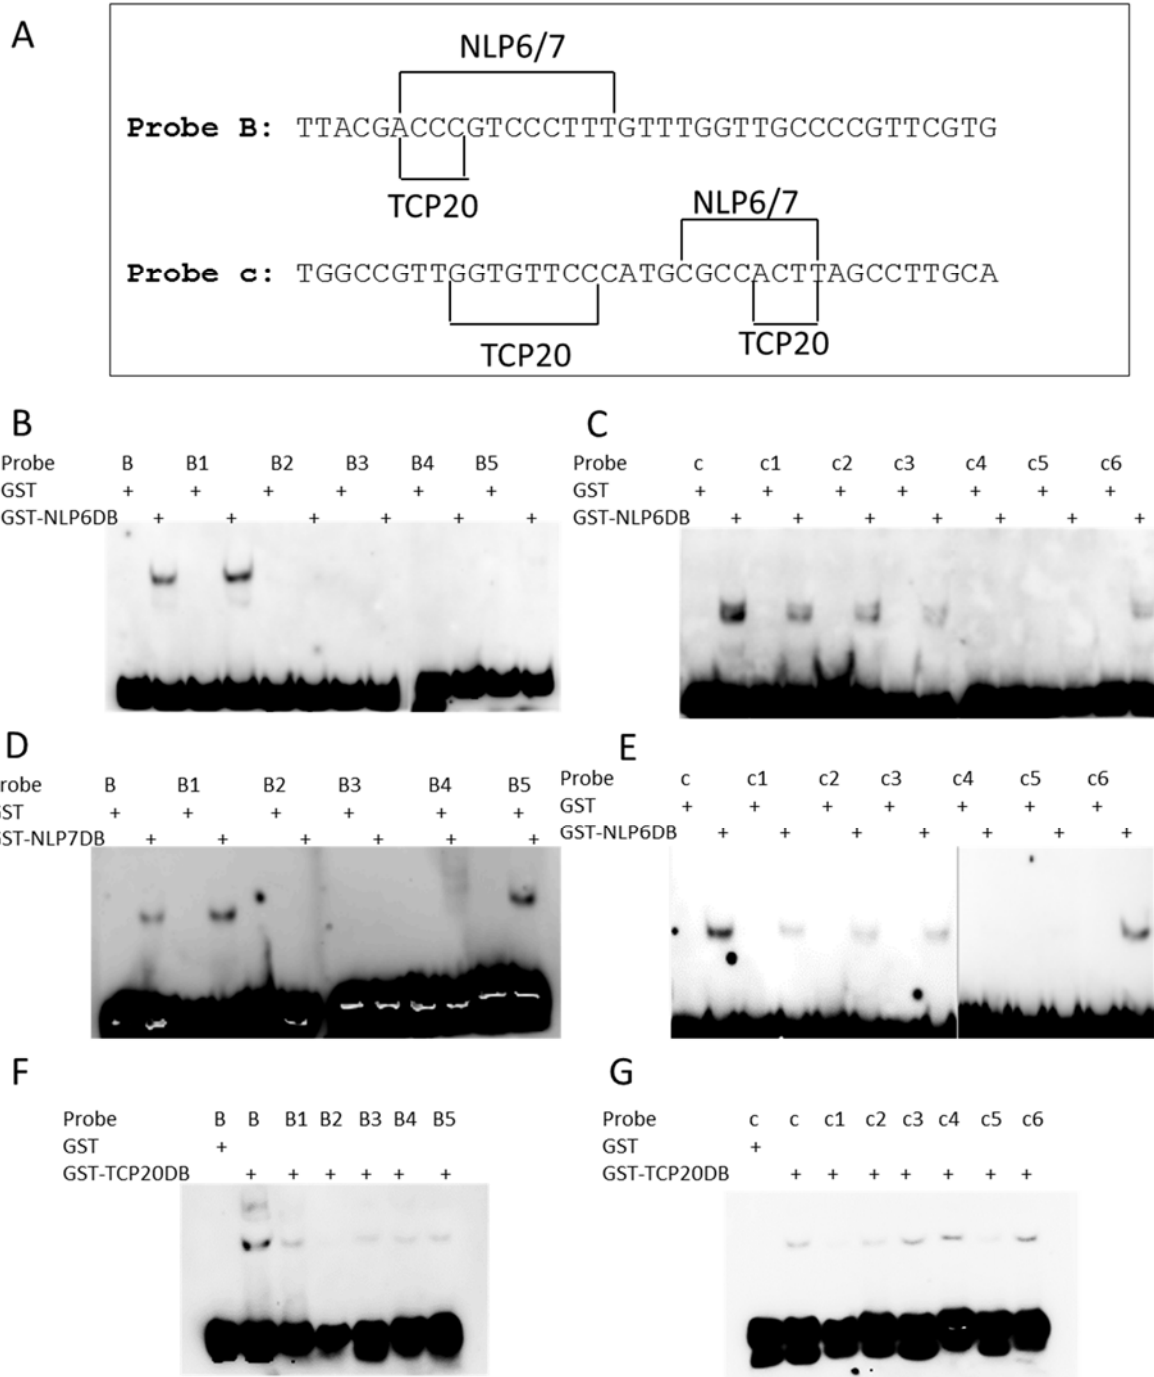

Figure S1. Identifications of TCP20 and NLP6&7 binding elements in the 109-bp *NIA1* enhancer fragment. **a**. Diagram of the TCP20 and NLP6&7 binding sites in probes B and C, respectively. **B-G**, EMSA experiments for testing NLP6DB (**B, C**), NLP7DB (**D, E**) and TCP20DB (**F, G**). Mutated probes (B1-B5 and c1-c6) have been used in EMSA to determine DNA *cis*-elements. All the probes are listed in Table S1.

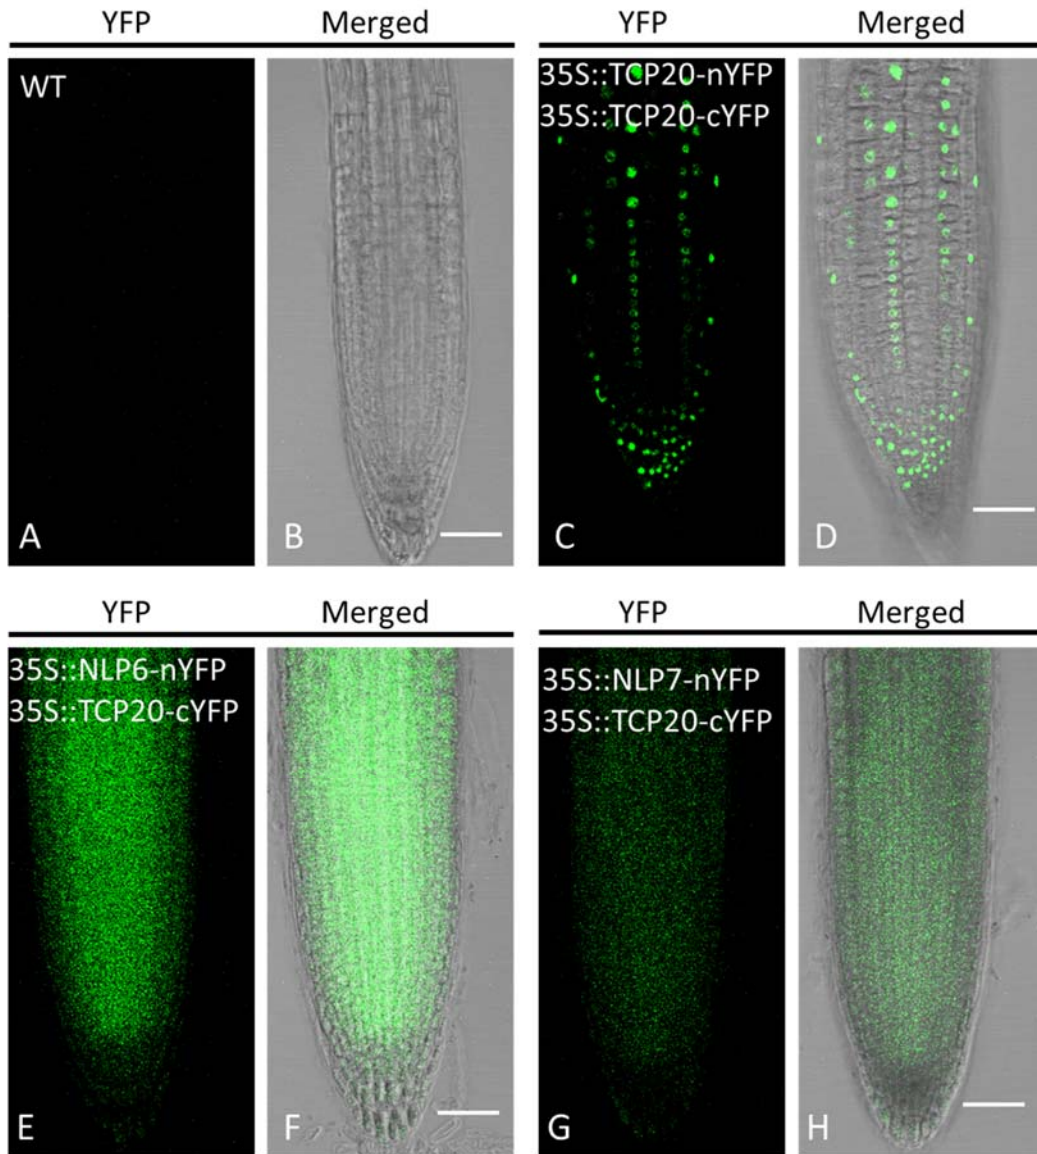

Figure S2. TCP20 -NLP6&7 interactions in transgenic *Arabidopsis* roots. BiFC constructs (NLP6-nYFP, NLP7-nYFP, TCP20-nYFP and TCP20-cYFP) were transformed into *Arabidopsis*. T1 plants were then crossed to obtain the progenies carrying both nYFP and cYFP derivatives. Scale bar: 50  $\mu$ m (**A-H**).



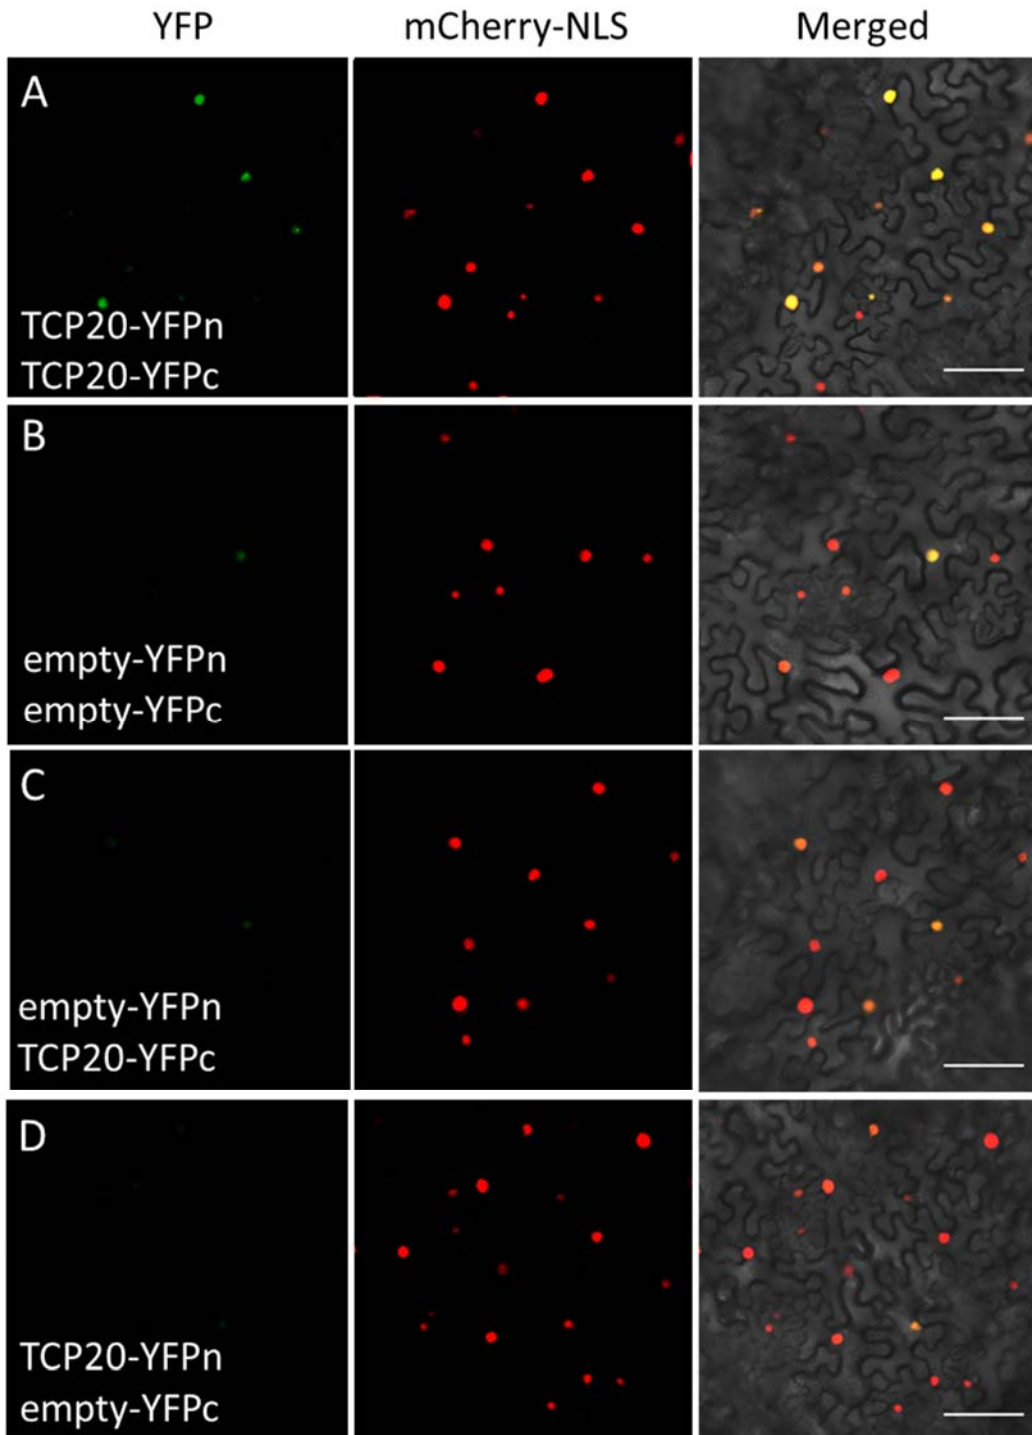

Figure S3. BiFC analysis of TCP20-TCP20 interactions and empty vectors. BiFC was conducted in leaves of *N. benthamiana* grown on 5 mM KNO<sub>3</sub> as N source. A mCherry-NLS (Nuclear Localization Signal) version was used as a nuclear marker. Scale bar: 100 μm.

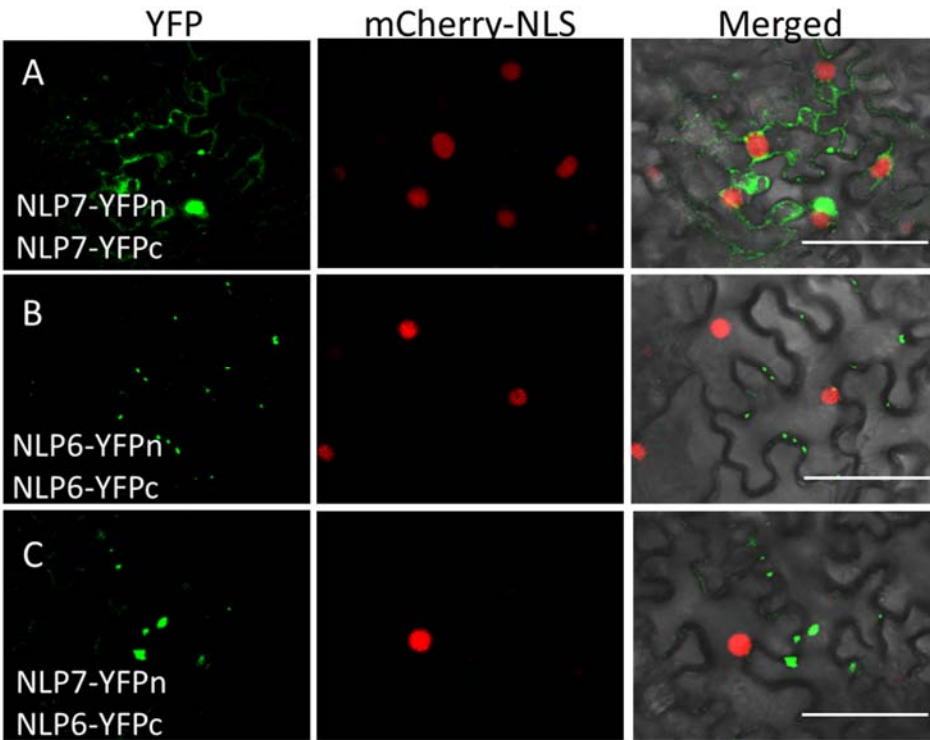

Figure S4. Protein-protein interaction in NLPs under nitrate-grown condition. BiFC was conducted in leaves of *N. benthamiana* grown on 5 mM KNO<sub>3</sub> as N source. mCherry-NLS was used as a nuclear marker. Scale bar: 100 μm.

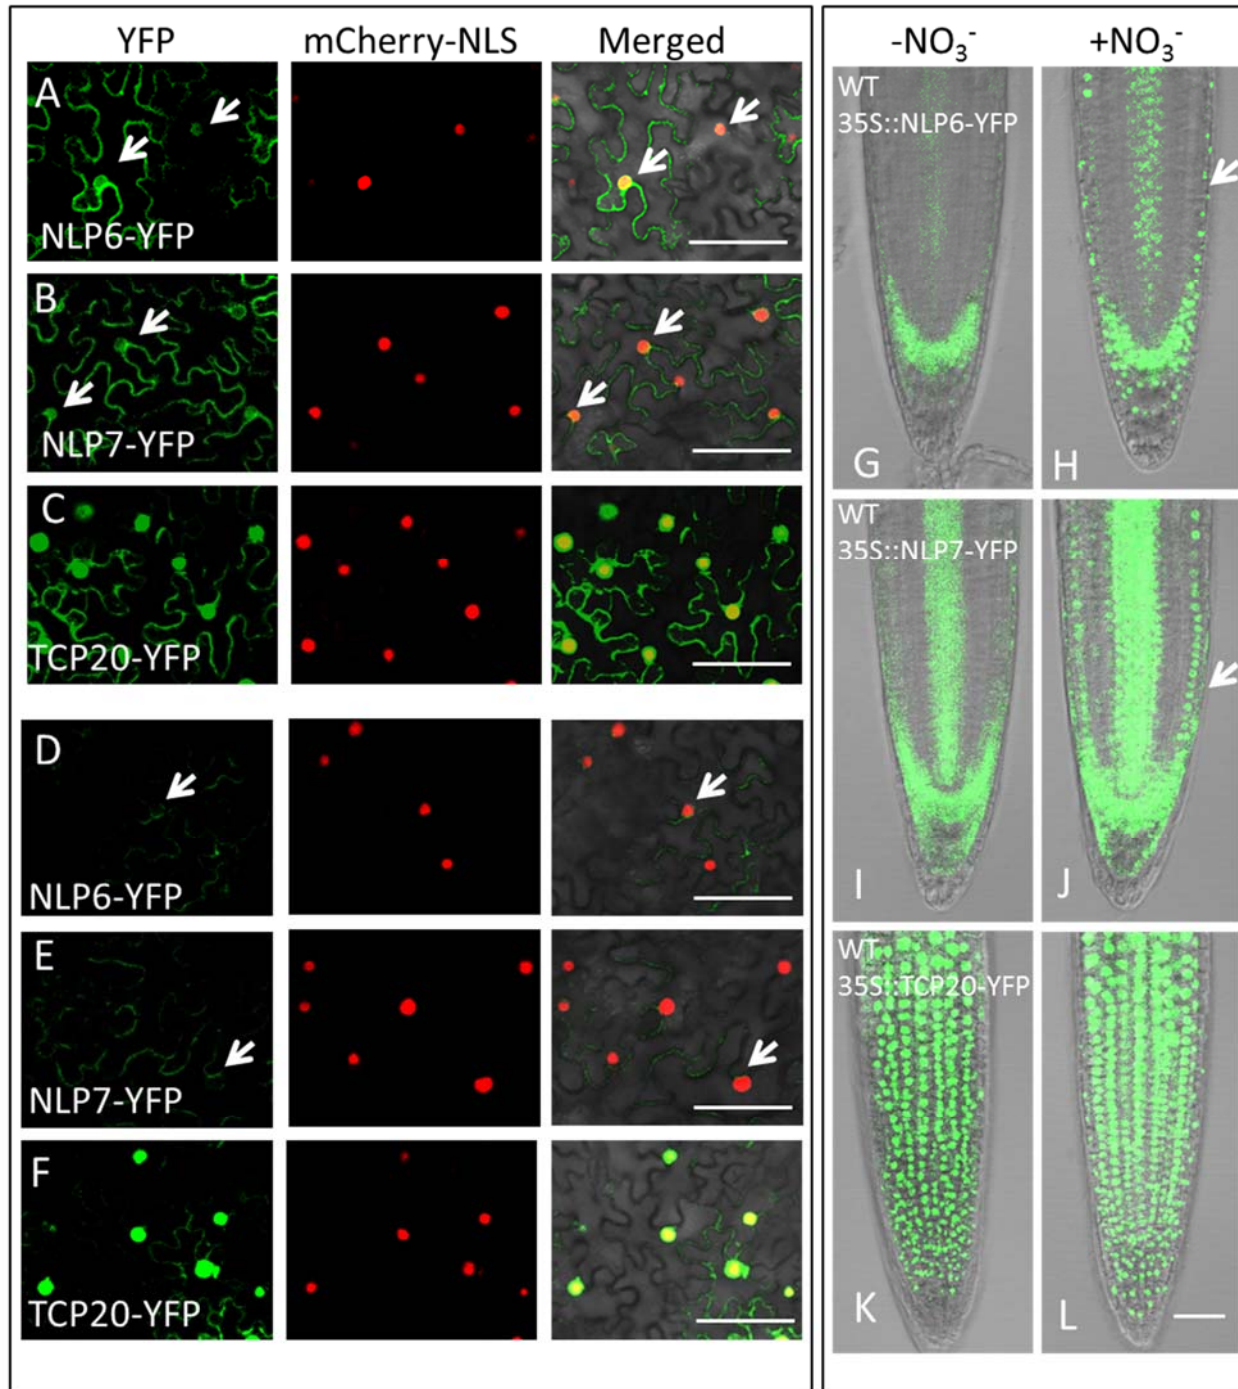

Figure S5. The subcellular localization of TCP20-YFP, NLP6-YFP and NLP7-YFP chimeric protein fusions in *N. benthamiana* transient expression system (A-F) and transgenic *Arabidopsis* (G-L). *N. benthamiana* was grown on 5 mM KNO<sub>3</sub> as sole N source (A-C) or under N starvation condition (D-F). Transgenic *Arabidopsis* seedlings were treated with N free medium (G, I and K) or nitrate medium containing 5 mM KNO<sub>3</sub> (H, J and L). White arrows indicate nucleus. Scale bar: 100  $\mu$ m (A-F), 50  $\mu$ m (G-L).

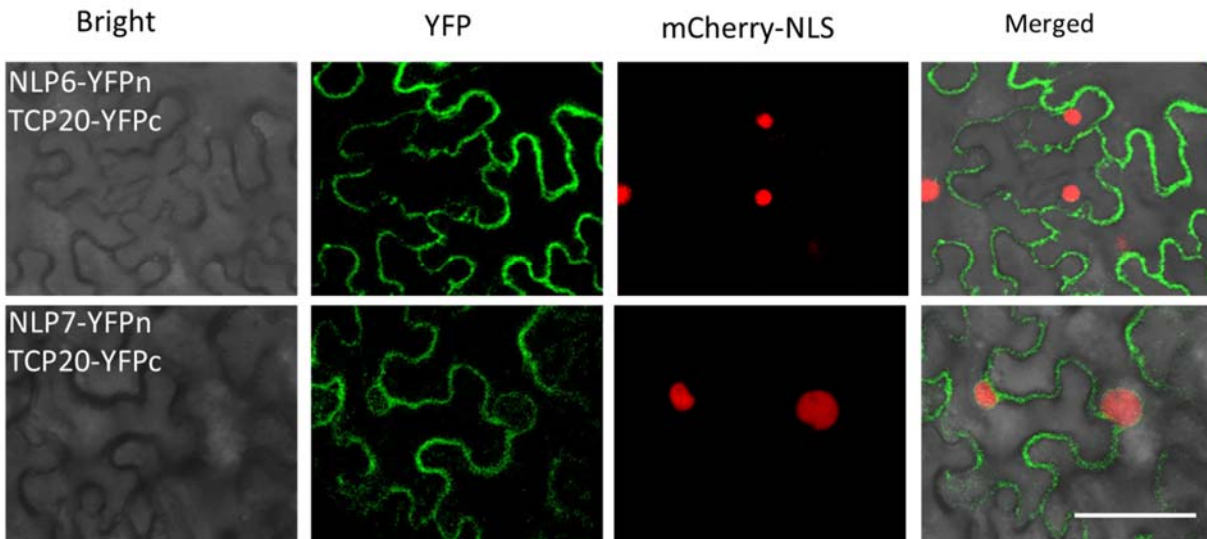

Figure S6. The subcellular locations of TCP20 -NLP6&7 interactions under nitrate-grown condition. *N. benthamiana* was grown on 5 mM KNO<sub>3</sub> as sole N source. Scale bar: 100 μm.

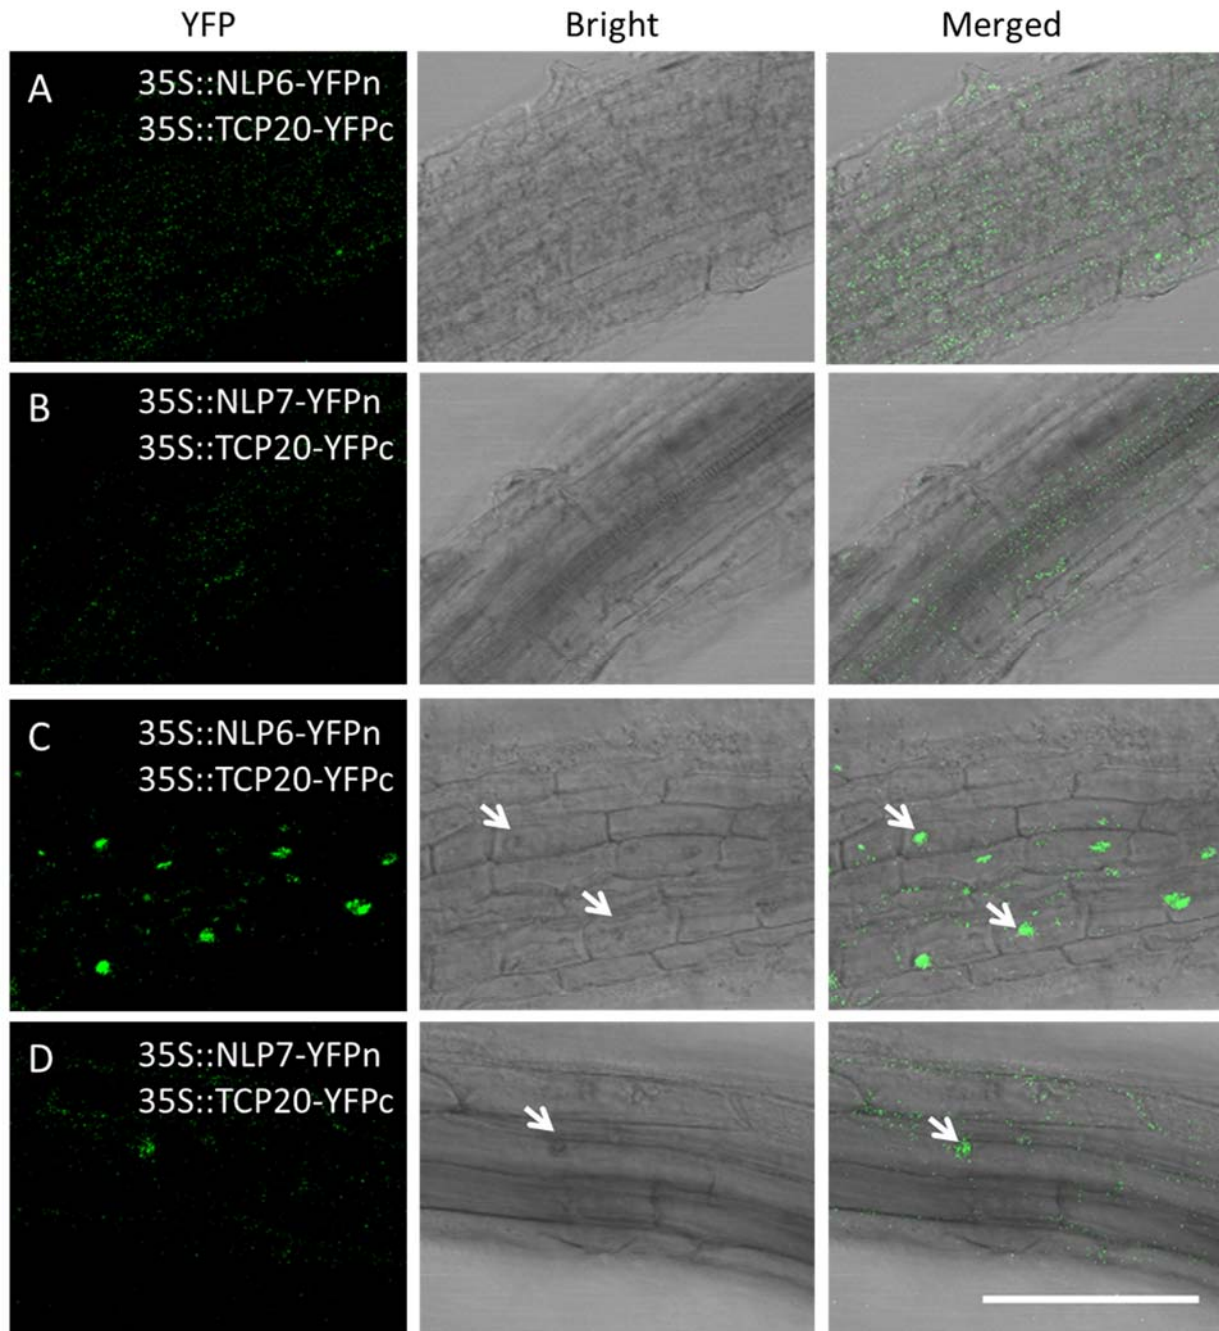

Figure S7. The subcellular locations of TCP20 -NLP6&7 interactions in transgenic *Arabidopsis* roots. Transgenic *Arabidopsis* seedlings grown on 5 mM KNO<sub>3</sub> as sole N source (**A-B**) and then transferred to N free plates for 2 days (**C-D**). White arrows indicate nucleus. Scale bar: 100  $\mu$ m.

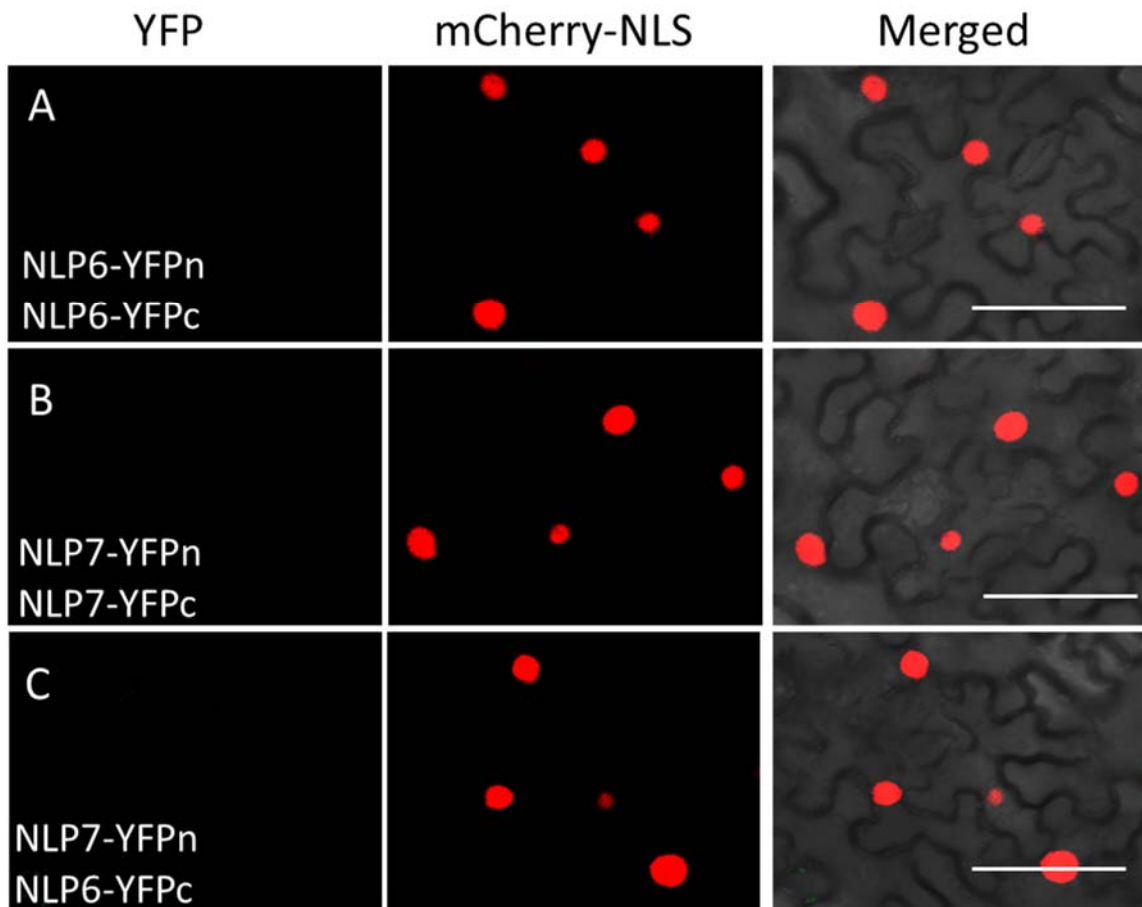

Figure S8. Protein-protein interaction in NLPs under N starvation. *N. benthamiana* was grown on 5 mM KNO<sub>3</sub> as sole N source and then received N starvation treatment. Scale bar: 100 μm.



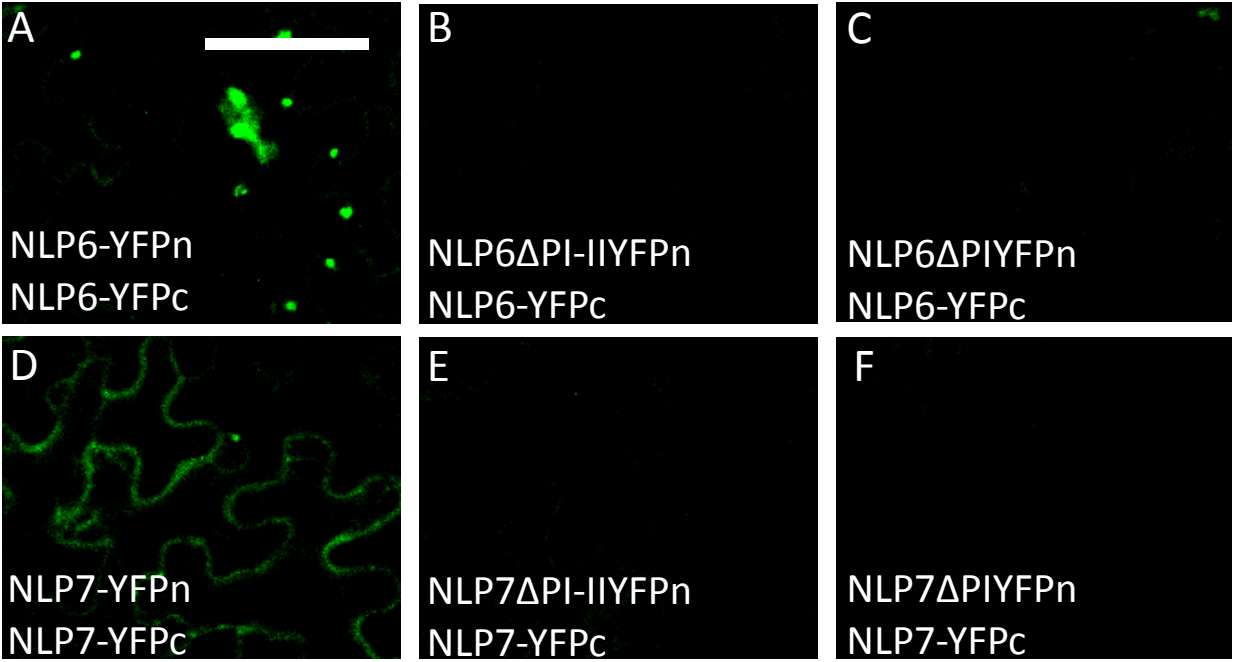

Figure S10. A PB1 domain of NLPs is important for their protein-protein interaction. BiFC assay for testing NLP6&7 deleted derivatives. *N. benthamiana* were grown on 5 mM KNO<sub>3</sub> as sole N source. Scale bar: 100  $\mu$ m.



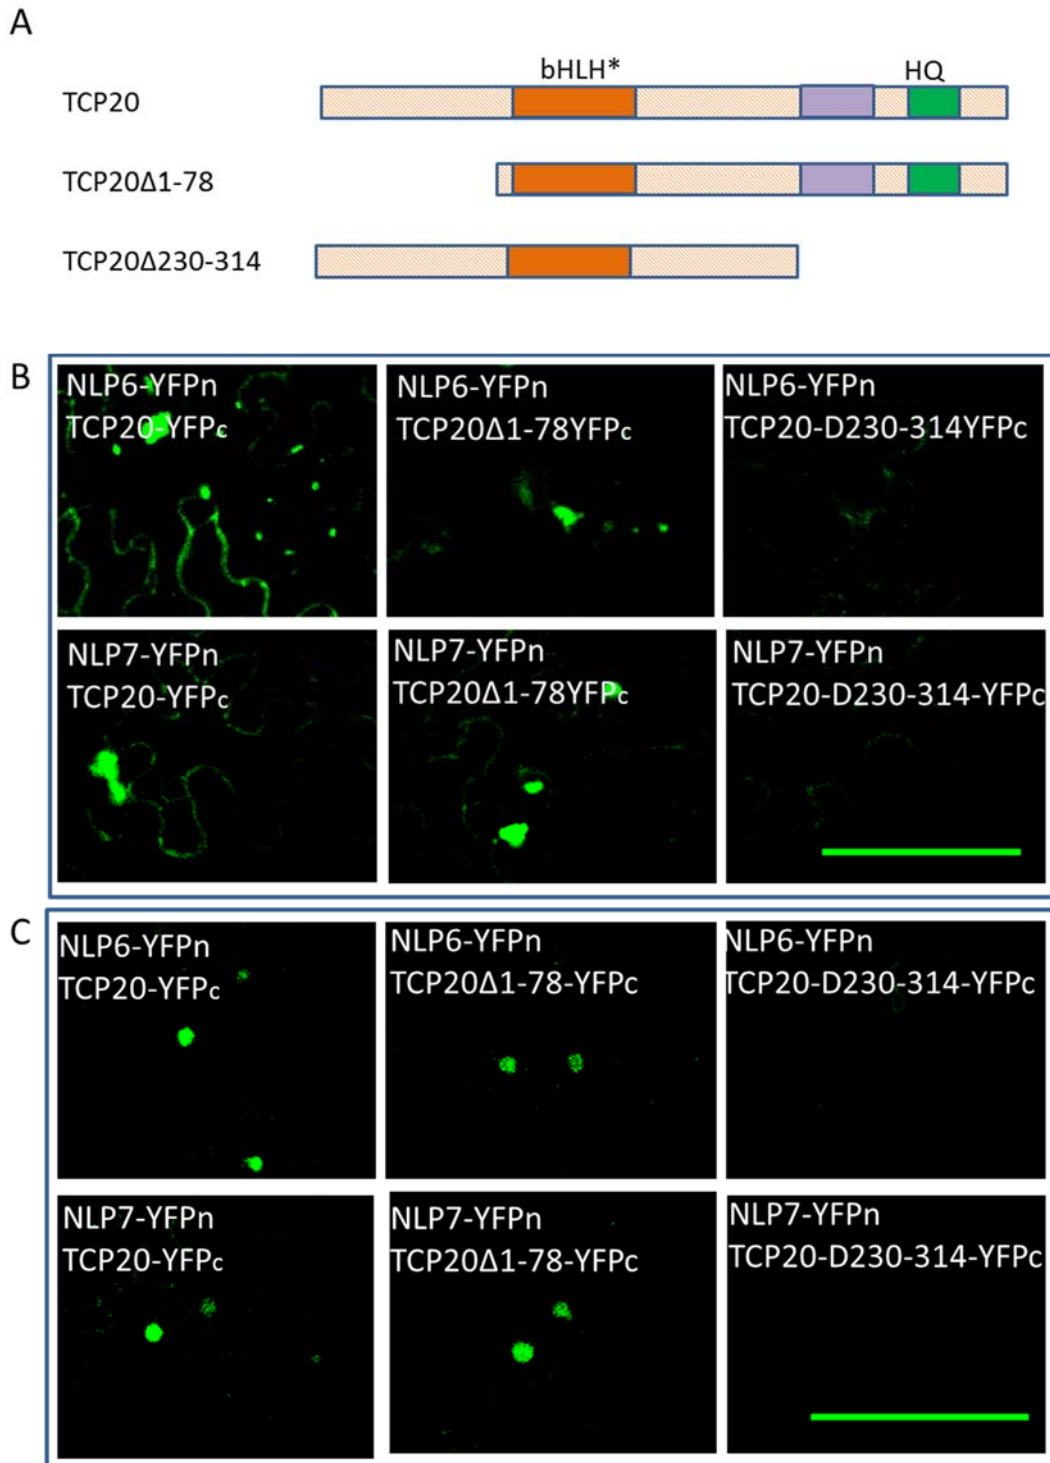

Figure S11. BiFC assay of interactions between NLP6&7 and deleted derivatives of TCP20. **A**. Schematic diagram of the TCP20 deletion derivatives. Orange and green boxes present bHLH\* and histidine glutamine rich domain (HQ) in TCP20. Purple box presents a conserved region adjacent to HQ module. **B**, BiFC was conducted in *N. benthamiana* grown on 5mm KNO<sub>3</sub> as sole N source. **C**, The experiment was conducted in N starved plants. Scale bar: 100  $\mu$ m.

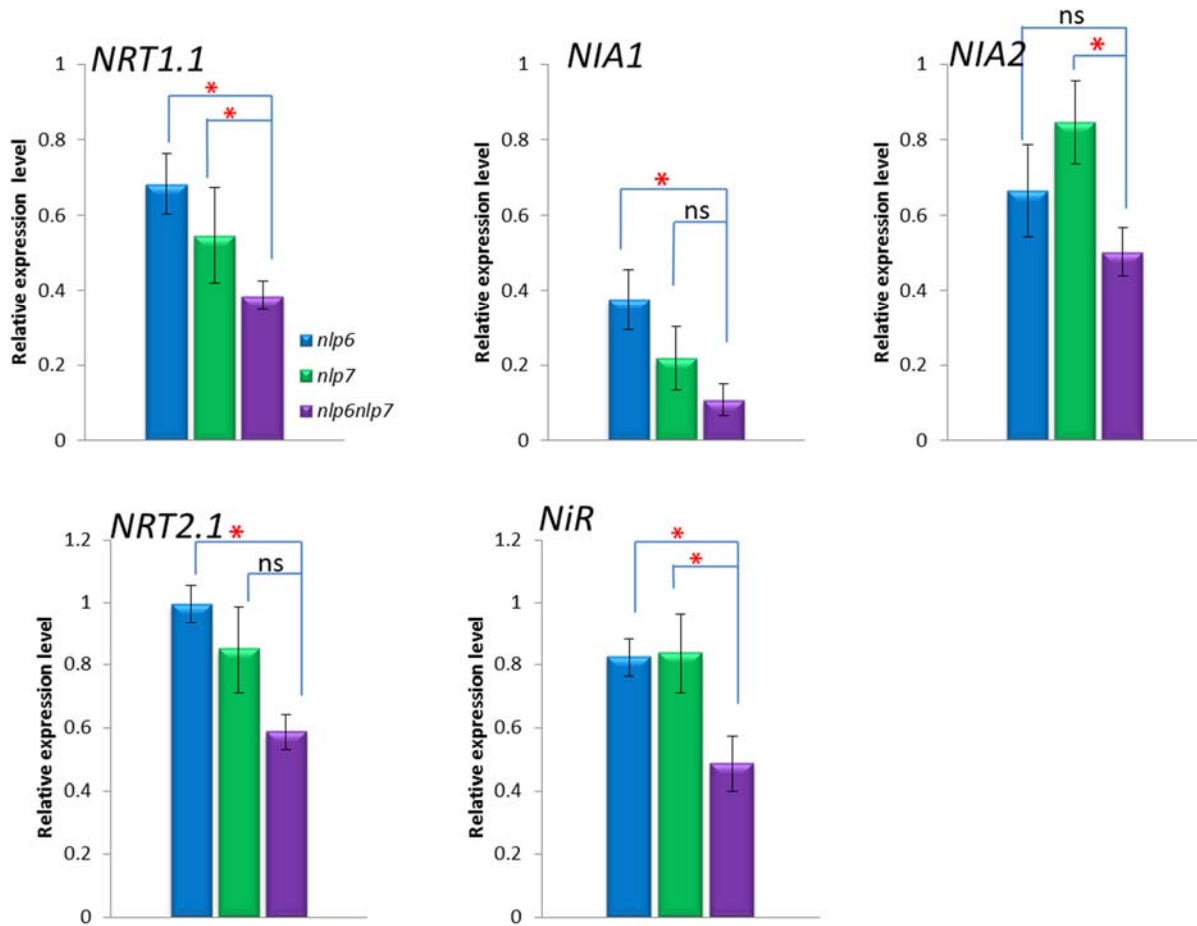

Figure S12. NLP6 and NLP7 are partially redundant activators of nitrate transport, assimilation and signaling genes under nitrate growth condition (5 mM KNO<sub>3</sub>). RT-PCR quantification of target gene expression levels in whole roots of WT and mutant lines was performed. Error bars show mean+SEM (n = 3 biological replicates). Red asterisks represent significant statistical difference between two indicated lines. \*p<0.05 (t-test).

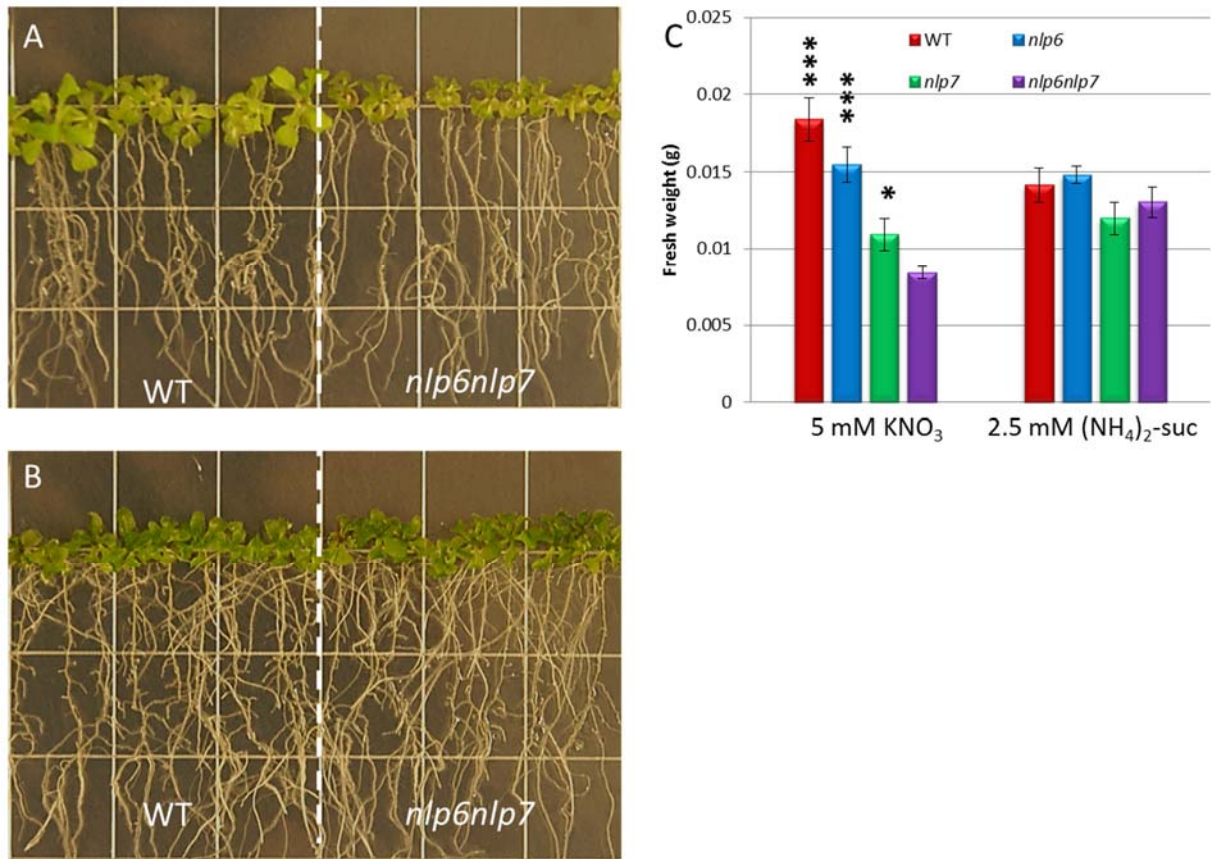

Figure S13. Phenotypes of *nlp6nlp7* double mutants under different nitrogen growth conditions. **A**, 5 mM nitrate grown. **B**, 2.5 mM (NH<sub>4</sub>)<sub>2</sub>-succinate. **C**. fresh weight of WT, *nlp6*, *nlp7* and *nlp6nlp7* mutants. Error bars show SEM (n =9). Black asterisks represent significant statistical difference compared to *nlp6nlp7* mutant. \*p<0.05, \*\*P<0.01, \*\*\*P<0.001 (t-test).

-351

TTCAAACCATGTAAACCAAACAGAGATCAACATCTAACTAACCGGATTTAACTAGCAAT

CTAATTCACACAAATCTTTTTTTTTTTTTTTTTTCTATATCCTTCACAGTCAATAAAAA

**NLP6&7** **ARF**  
GAAT **AAGTGGGC** CGTTGTGACTTCAAATCCCAATAGTGAAAAAGCCCGATTTCGT **TGTCT**  
**TTCACCCG** TCP20 TCP20

**TACAGCCGT** **AAGGCCCG** TAACAAGCCCACGACCTCTAATTTTTCAAACAATCAGACC  
**TTCGGGC** TCP20

**NLP6&7**  
GTTGGGGTTCATTTATTTCTTTAATTTGTTTTTATTTCTTATAAAACGGCTCATCGTC

CTCAAGAAGCCTCCTATATAGAAGACGCCCCACTACTTAGACTTTTTCTACTACAAACC  
↓

TGAGATTTTAGTCTGAGAGAAAGAGAAGAGAACACTAAG**ATG**

Figure S14. Proximal *CYCB1;1* promoter region. Putative NLP6&7-binding sites are indicated with green boxes. Red underlines and yellow box are indicated TCP20 and auxin response factor (ARF)-binding sites respectively, which have been proposed in Li, et al<sup>30</sup>. Blue arrow represents the transcription start site. The start codon is highlighted with a blue box.

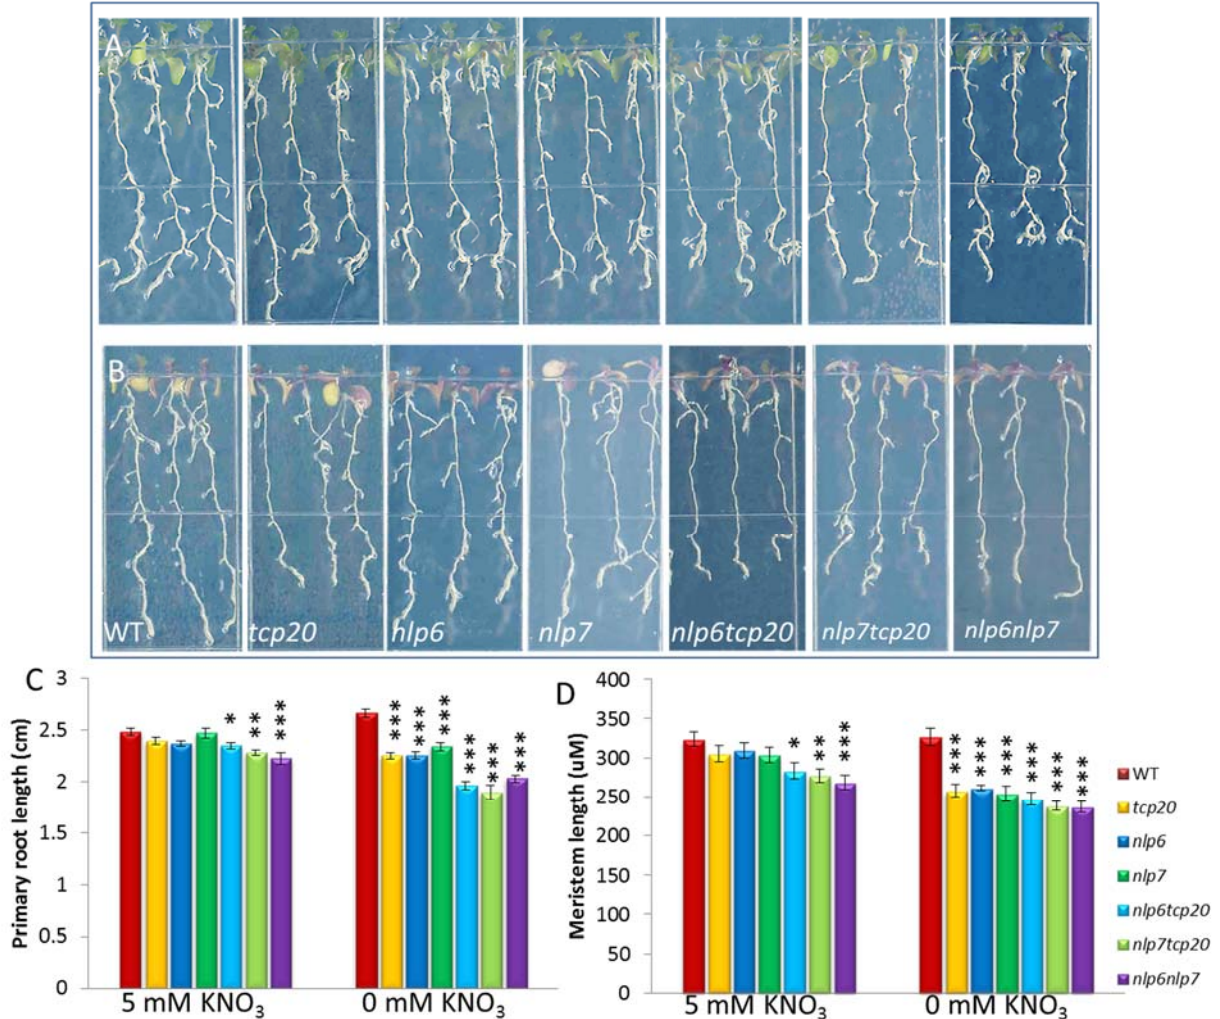

Figure S15. Root phenotype under 5 mM nitrate (A) or N starvation (B), primary root length (C) and root meristem length (D) of WT, single mutants and double mutants under N starvation treatment. For root phenotype and primary root length, *Arabidopsis* seedlings were grown on 5 mM KNO<sub>3</sub> plates for 6-7 days and then were transferred to new 5 mM KNO<sub>3</sub> plates or N free plates for three days. Error bars show SEM (n=18). For measuring meristem length, Seedlings were grown on 5 mM KNO<sub>3</sub> medium for 3 d and then were transferred to N free medium for 3 d with a 8-h light. Error bars show SEM (n=10). One-way ANOVA was performed and followed by t-test to calculate the p-value (using WT as control). Black asterisks represent statistic difference between WT and mutants under same nitrate condition. \*p<0.05, \*\*P<0.01, \*\*\*P<0.001.

### 3. Supplementary Tables.

Table S1. Probes used in this work. All the probes are listed as below. Orange letters represent mutated nucleotides in the probes.

NIA-109 bp:

TCGAAAATTCAAACAAGTGACAAAAATAATATTACGACCCGTCCCTTTGTTTGGTTGC  
CCCGTTCGTGTATTTGCTTGGCCGTTGGTGTTC CATGCGCCACTTAGCCT

A: TCGAAAATTCAAACAAGTGACAAAAATAATATTA

B: TTACGACCCGTCCCTTTGTTTGGTTGCCCGTTCGTG

C: GTGTATTTGCTTGGCCGTTGGTGTTC CATGCGCCACTTAGCCT

D: CAAGTGACAAAAATAATATTACGACCCGTCCCTTTG

E: GTTGCCCGTTCGTGTATTTGCTTGGCCGTTGGTG

B1: TCTGTACCCGTCCCTTTGTTTGGTTGCCCGTTCGTG

B2: TTACGCGAAGTCCCTTTGTTTGGTTGCCCGTTCGTG

B3: TTACGACCCACA ACTTTGTTTGGTTGCCCGTTCGTG

B4: TTACGACCCGTCC TCCCGTTTGGTTGCCCGTTCGTG

B5: TTACGACCCGTCCCTTTACACGGTTGCCCGTTCGTG

c: TGGCCGTTGGTGTTC CATGCGCCACTTAGCCT

c1: TGGCCGTTATCATTCCCATGCGCCACTTAGCCT

c2: TGGCCGTTGGTG GCATCATGCGCCACTTAGCCT

c3: TGGCCGTTGGTGTTC TGGACGCCACTTAGCCT

c4: TGGCCGTTGGTGTTC CATGTAATACTTAGCCT

c5: TGGCCGTTGGTGTTC CATGCGCCGACCAGCCT

c6: TGGCCGTTGGTGTTC CATGCGCCACTTGTAAT

Table S2. Primers used in cloning.

TCP20DB-F: GAGGATCC-TCTAACAAAGACAGACACACTAAAG  
TCP20DB-R: TGAACCAAGTAGCTGCAATAATC  
NLP6DB-F: GAGGATCCGTGAAAAAATCAGAAAGGAAG  
NLP6DB-R: AGCACCTTGAACCGAGTC  
NLP7DB-F: AAGAAGAAAACAGAGAAAAAG  
NLP7DB-R: GCGGATCCAGTACCTTGAACAGATTTCG  
TCP20pB42AD-F: CATGGATCCCAAGAACCTAAATCG  
TCP20pB42AD-R: CTCTCGAGTTAACGACCTGAGCCTTGAG  
NLP6pGilda-F: AACGGCGACTGGCTGGAATTCATGGAACCTTGACGACTTG  
NLP6pGilda-R: TTGGCTGCAGGTCGACTCGAGTCACAAGCACATCATAGTTTC  
NLP7pGilda-F: AACGGCGACTGGCTGGAATTCATGTGCGAGCCCGATGATAATTC  
NLP7pGilda-R: TTGGCTGCAGGTCGACTCGAGTCACAATTCTCCAGTGCTCTCG  
TCP20-NcoI-F: CACCATTTACGAACGATAGCATGGATCCCAAGAACCTAAATCG  
TCP20-NcoI-R:  
AGCTCCTCGCCCTTGCTCACCATGGCAGCACGACCTGAGCCTTGAGAATC  
NLP6-NcoI-F: CACCATTTACGAACGATAGCATGGAACCTTGACGACTTG  
NLP6-NcoI-R: AGCTCCTCGCCCTTGCTCACCATGGCAGCCAAGCACATCATAGTTTCC  
NLP6-Nco-F: CACCATTTACGAACGATAGCATGTGCGAGCCCGATGATAATTC  
NLP6-Nco-R: AGCTCCTCGCCCTTGCTCACCATGGCAGCCAATTCTCCAGTGCTCTCG  
TCP20-BIFCF2: CAATTACTATTTACAATTGTCGACATGGATCCCAAGAACCTAAATCG  
TCP20-BIFCR2: GATTTTCGAACCCGGGGTACCACGACCTGAGCCTTGAG  
TCP20 $\Delta$ 72 BIFC2:  
CAATTACTATTTACAATTGTCGACATGAAAGACAGACACACTAAAG  
TCP20 $\Delta$ 230R: GATTTTCGAACCCGGGGTACCAAATCAAACCAGGAAACC  
TCP20 $\Delta$ 270R: GATTTTCGAACCCGGGGTACCAAAGACTGAGGATTCAAAC  
TCP20 $\Delta$ HLLH-R: CAATAATCGAAAGAGCAGGCATCCGAATTCGTCGACCTC  
TCP20 $\Delta$ HLLH-F: GCCTGCTCTTTCGATTATTGCAGCTACTGGTTCAGG  
NLP6-BIFCF2: CAATTACTATTTACAATTGTCGACATGGAACCTTGACGACTTG  
NLP6-BIFCR2: GATTTTCGAACCCGGGGTACCCAAGCACATCATAGTTTCC  
NLP6 $\Delta$ PI-II-R: GATTTTCGAACCCGGGGTACCGAGCTTATGTTGGAGAATTG  
NLP6 $\Delta$ PI-R: GATTTTCGAACCCGGGGTACCCCTTTTGCCACTTGCTG  
NLP7-BIFCF2: CAATTACTATTTACAATTGTCGACATGTGCGAGCCCGATGATAATTC  
NLP7-BIFCR2: GATTTTCGAACCCGGGGTACCCAATTCTCCAGTGCTCTCG  
NLP7 $\Delta$ PI-II-R: GATTTTCGAACCCGGGGTACCCGTTCTCATTCTGAGCCTGATGG  
NLP7 $\Delta$ PI-R: GATTTTCGAACCCGGGGTACCCCTTTAGCCACTTCATCC

Table S3. Primers used in qPCR.

| Gene           | Forward primer          | Reverse primer         |
|----------------|-------------------------|------------------------|
| <i>NIA1</i>    | GGTGCTGGTGTCTTCTGGTCACT | GGGTCTGGTCGGGTGTTC     |
| <i>NRT1.1</i>  | AAAGCTGCCACACACTGAAC    | ATTGTGCGACTGATAATGTCGT |
| <i>NRT2.1</i>  | CCACAGATCCAGTGAAAGG     | CATTGTTGGGTGTGTTCTC    |
| <i>NiR</i>     | CCGGTAGCCAGTTCTGCG      | CCTATTCGTCCCCCGACGT    |
| <i>NIA2</i>    | CGAGACACACAACAGCAACGC   | GCAACGGGACAGGGGTGA     |
| <i>CYCB1;1</i> | CCAGCACTCTCAAGCATCAC    | GGATCAAAGCCACAGCGAAG   |



**Table S4.**

**(A)** Two-way ANOVA analysis of the relative mRNA levels of key genes of nitrate assimilation & signaling and of cell cycle gene, *CYCBI;1* in response to nitrate status.

**(B)** Two-way ANOVA analysis of primary root meristem cell number, primary root meristem length, and primary root length.

Note: Two independent variables in our experiments are shown as “Sample (Nitrogen)”, which means N conditions, i.e. continuous nitrate condition versus N starvation, and as “Columns (Gtype)”, which means the genotypes i.e. WT, *tcp20*, *nlp6*, *nlp7*, *nlp6tcp20*, *nlp7tcp20* and *nlp6nlp7*.

**A**Two-way ANOVA: Relative mRNA level of *NRT1.1*

| <i>Source of Variation</i>   | <i>SS</i> | <i>df</i> | <i>MS</i> | <i>F</i> | <i>P-value</i> | <i>F crit</i> |
|------------------------------|-----------|-----------|-----------|----------|----------------|---------------|
| Sample (Nitrogen)            | 0.62      | 1         | 0.62      | 31.93    | ***4.7E-6      | 4.20          |
| Columns (Gtype)              | 0.95      | 6         | 0.16      | 8.23     | ***3.5E-5      | 2.45          |
| Interaction (NitrogenxGtype) | 0.36      | 6         | 0.06      | 3.14     | *0.018         | 2.45          |
| Within                       | 0.54      | 28        | 0.02      |          |                |               |
| Total                        | 2.48      | 41        |           |          |                |               |

Two-way ANOVA: Relative mRNA level of *NIA1*

| <i>Source of Variation</i>   | <i>SS</i> | <i>df</i> | <i>MS</i> | <i>F</i> | <i>P-value</i> | <i>F crit</i> |
|------------------------------|-----------|-----------|-----------|----------|----------------|---------------|
| Sample (Nitrogen)            | 10.79     | 1         | 10.79     | 45.60    | ***2.5E-7      | 4.20          |
| Columns (Gtype)              | 23.50     | 6         | 3.92      | 16.56    | ***4.7E-8      | 2.45          |
| Interaction (NitrogenxGtype) | 3.53      | 6         | 0.59      | 2.48     | *0.047         | 2.45          |
| Within                       | 6.62      | 28        | 0.24      |          |                |               |
| Total                        | 44.44     | 41        |           |          |                |               |

Two-way ANOVA: Relative mRNA level of *NIA2*

| <i>Source of Variation</i>   | <i>SS</i> | <i>df</i> | <i>MS</i> | <i>F</i> | <i>P-value</i> | <i>F crit</i> |
|------------------------------|-----------|-----------|-----------|----------|----------------|---------------|
| Sample (Nitrogen)            | 53.24     | 1         | 53.24     | 30.98    | ***5.9E-6      | 4.20          |
| Columns (Gtype)              | 57.82     | 6         | 9.64      | 5.61     | ***0.001       | 2.45          |
| Interaction (NitrogenxGtype) | 58.29     | 6         | 9.71      | 5.65     | ***0.001       | 2.45          |
| Within                       | 48.11     | 28        | 1.72      |          |                |               |
| Total                        | 217.45    | 41        |           |          |                |               |

Two-way ANOVA: Relative mRNA level of *NRT2.1*

| <i>Source of Variation</i>   | <i>SS</i> | <i>df</i> | <i>MS</i> | <i>F</i> | <i>P-value</i> | <i>F crit</i> |
|------------------------------|-----------|-----------|-----------|----------|----------------|---------------|
| Sample (Nitrogen)            | 14.96     | 1         | 14.96     | 0.71     | 0.408          | 4.20          |
| Columns (Gtype)              | 142.56    | 6         | 23.76     | 1.12     | 0.376          | 2.45          |
| Interaction (NitrogenxGtype) | 119.36    | 6         | 19.89     | 0.94     | 0.484          | 2.45          |
| Within                       | 593.77    | 28        | 21.21     |          |                |               |
| Total                        | 870.64    | 41        |           |          |                |               |

Two-way ANOVA: Relative mRNA level of *NiR*

| <i>Source of Variation</i>   | <i>SS</i> | <i>df</i> | <i>MS</i> | <i>F</i> | <i>P-value</i> | <i>F crit</i> |
|------------------------------|-----------|-----------|-----------|----------|----------------|---------------|
| Sample (Nitrogen)            | 76.31     | 1         | 76.31     | 42.90    | ***4.2E-7      | 4.20          |
| Columns (Gtype)              | 16.00     | 6         | 2.67      | 1.50     | 0.215          | 2.45          |
| Interaction (NitrogenxGtype) | 4.77      | 6         | 0.80      | 0.45     | 0.841          | 2.45          |
| Within                       | 49.80     | 28        | 1.78      |          |                |               |
| Total                        | 146.89    | 41        |           |          |                |               |

Two-way ANOVA: Relative mRNA level of *CYCB1;1*

| <i>Source of Variation</i>   | <i>SS</i> | <i>df</i> | <i>MS</i> | <i>F</i> | <i>P-value</i> | <i>F crit</i> |
|------------------------------|-----------|-----------|-----------|----------|----------------|---------------|
| Sample (Nitrogen)            | 0.27      | 1         | 0.27      | 58.09    | ***2.7E-8      | 4.20          |
| Columns (Gtype)              | 0.07      | 6         | 0.01      | 2.47     | *0.048         | 2.45          |
| Interaction (NitrogenxGtype) | 0.07      | 6         | 0.01      | 2.45     | *0.050         | 2.45          |
| Within                       | 0.13      | 28        | 0.00      |          |                |               |
| Total                        | 0.54      | 41        |           |          |                |               |

**B**

Two-way ANOVA: Primary root meristem cell number

| <i>Source of Variation</i>   | <i>SS</i> | <i>df</i> | <i>MS</i> | <i>F</i> | <i>P-value</i> | <i>F crit</i> |
|------------------------------|-----------|-----------|-----------|----------|----------------|---------------|
| Sample (Nitrogen)            | 651.46    | 1         | 651.46    | 57.75    | ***6E-12       | 3.92          |
| Columns (Gtype)              | 1485.99   | 6         | 247.66    | 21.95    | ***2E-17       | 2.17          |
| Interaction (NitrogenxGtype) | 149.04    | 6         | 24.84     | 2.20     | *0.047         | 2.17          |
| Within                       | 1421.40   | 126       | 11.28     |          |                |               |
| Total                        | 3707.89   | 139       |           |          |                |               |

Two-way ANOVA: Primary root meristem length

| <i>Source of Variation</i>   | <i>SS</i> | <i>df</i> | <i>MS</i> | <i>F</i> | <i>P-value</i> | <i>F crit</i> |
|------------------------------|-----------|-----------|-----------|----------|----------------|---------------|
| Sample (Nitrogen)            | 44077.23  | 1         | 44077.23  | 55.86    | ***1E-11       | 3.92          |
| Columns (Gtype)              | 70815.24  | 6         | 11802.54  | 14.96    | ***7E-13       | 2.17          |
| Interaction (NitrogenxGtype) | 10273.90  | 6         | 1712.32   | 2.17     | *0.050         | 2.17          |
| Within                       | 99429.76  | 126       | 789.13    |          |                |               |
| Total                        | 224596.13 | 139       |           |          |                |               |

Two-way ANOVA: Primary root length

| <i>Source of Variation</i>   | <i>SS</i> | <i>df</i> | <i>MS</i> | <i>F</i> | <i>P-value</i> | <i>F crit</i> |
|------------------------------|-----------|-----------|-----------|----------|----------------|---------------|
| Sample (Nitrogen)            | 1.77      | 1         | 1.77      | 58.10    | ***6E-13       | 3.88          |
| Columns (Gtype)              | 6.54      | 6         | 1.09      | 35.77    | ***1E-30       | 2.14          |
| Interaction (NitrogenxGtype) | 1.98      | 6         | 0.33      | 10.81    | ***1E-10       | 2.14          |
| Within                       | 7.26      | 238       | 0.03      |          |                |               |
| Total                        | 17.55     | 251       |           |          |                |               |

#### 4. References.

46. Gibson DG (2011) Enzymatic assembly of overlapping DNA fragments. *Methods Enzymol* 498: 349-361.
47. Mack AM, Crawford NM (2001) The Arabidopsis TAG1 transposase has an N-terminal zinc finger DNA binding domain that recognizes distinct subterminal motifs. *Plant Cell* 13(10):2319–2331.
48. Ripoll JJ, Bailey LJ, Mai QA, Wu SL, Hon CT, Chapman EJ, Ditta GS, Estelle M, and Yanofsky MF (2015) microRNA regulation of fruit growth. *Nature Plants* 1:15036
49. Lincoln C, Long J, Yamaguchi J, Serikawa K, & Hake S (1994) A knotted1-like homeobox gene in Arabidopsis is expressed in the vegetative meristem and dramatically alters leaf morphology when overexpressed in transgenic plants. *Plant Cell* 6 (12): 1859-1876.
50. Wang R, Zhang Y, Kieffer M, Yu H, Kepinski S & Estelle M (2016) HSP90 regulates temperature-dependent seedling growth in Arabidopsis by stabilizing the auxin co-receptor F-box protein TIR1. *Nat Commun* 7:10269.
51. Bechtold N, Ellis J, Pelletier G (1993) In planta Agrobacterium-mediated gene transfer by infiltration of adult Arabidopsis thaliana plants. *C R Acad Sci Paris Life Sci* 316: 1194–119.
